# Supplementary material
Source: PubMed Central journal article supplement (PMC9350957)

Figure S1

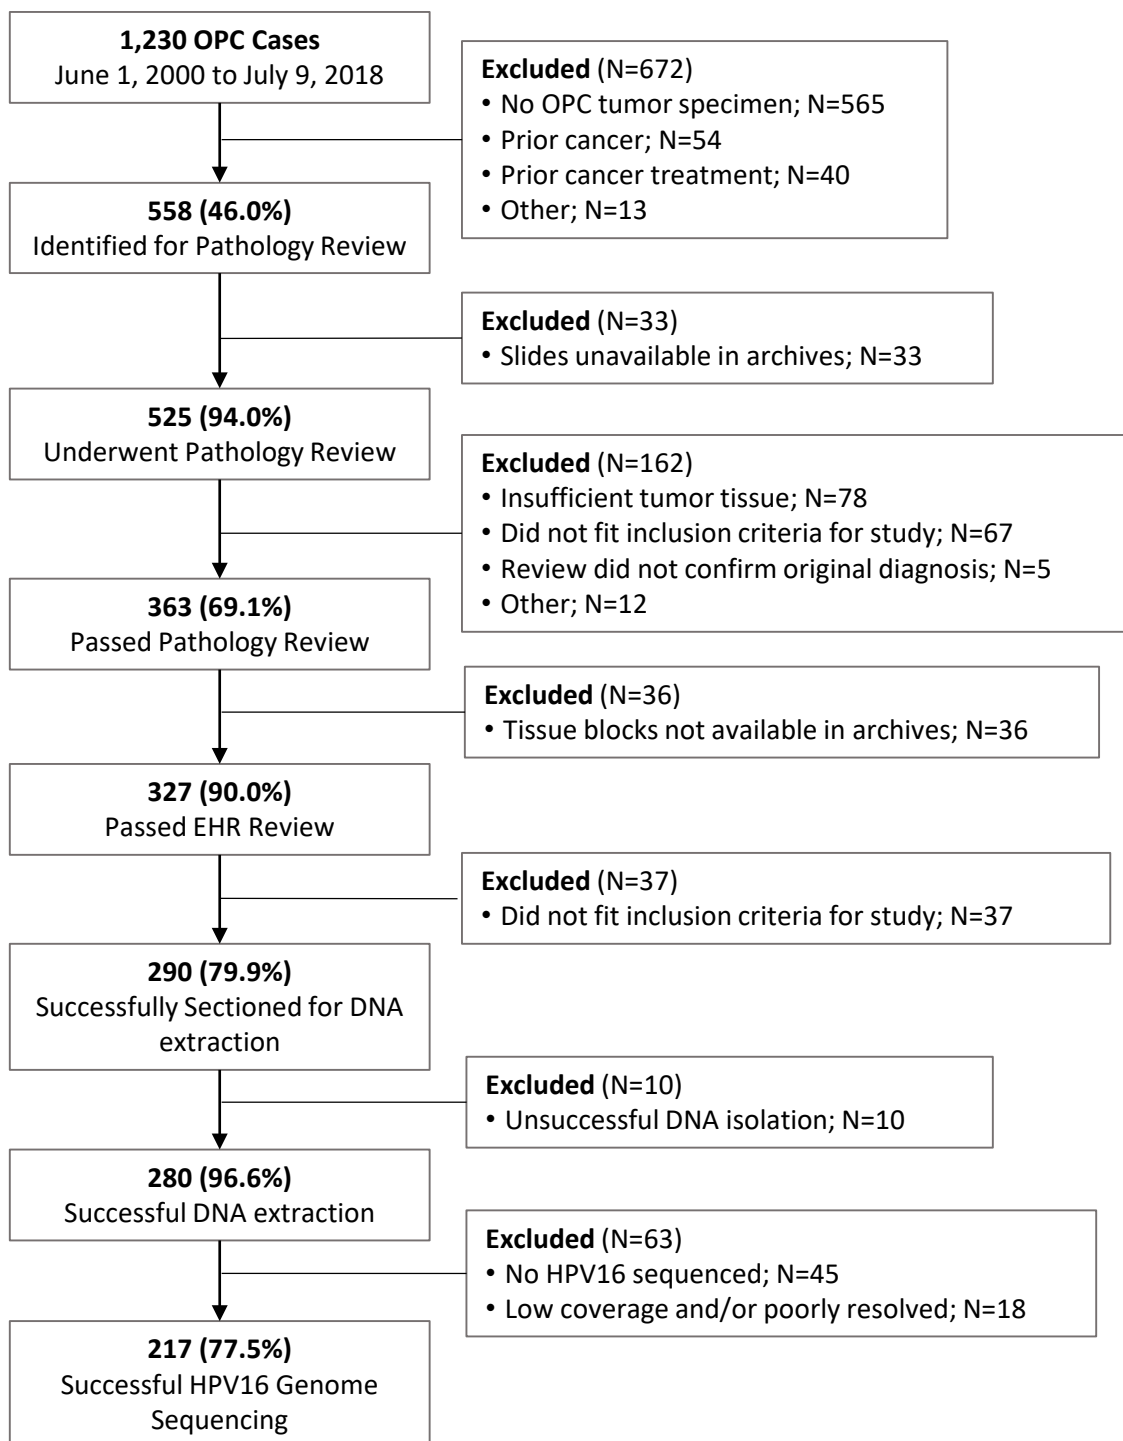

Supplement: NIHMS1801956-supplement-2.pdf [file NIHMS1801956-supplement-2.pdf]

Figure S2

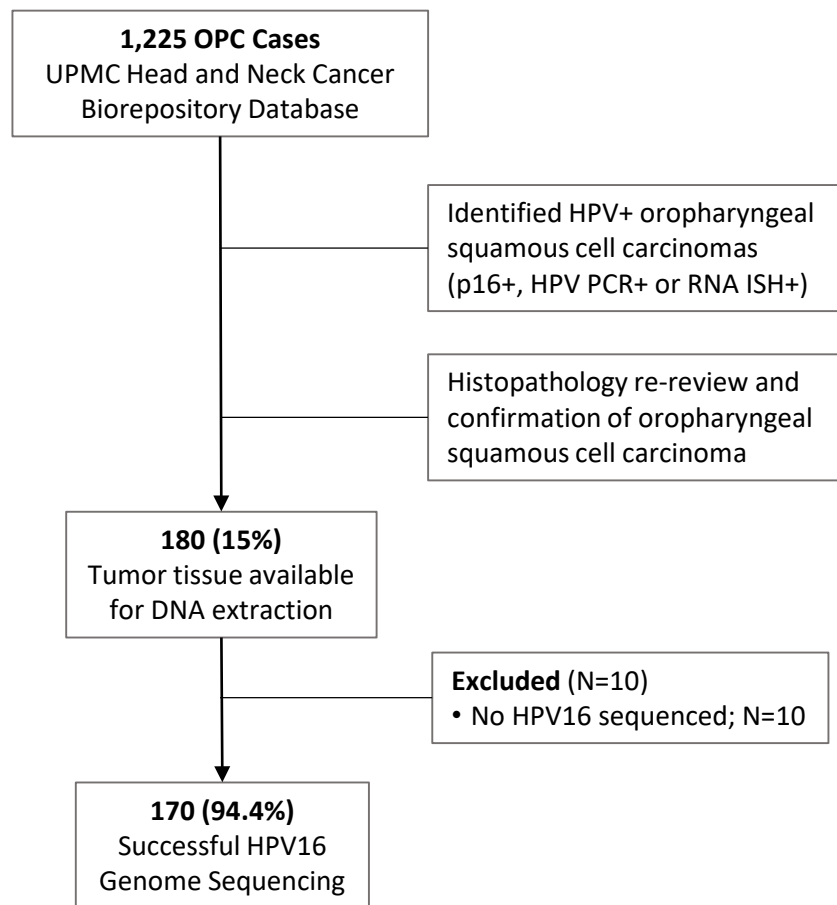

Supplement: NIHMS1801956-supplement-3.pdf [file NIHMS1801956-supplement-3.pdf]
